# Supplementary material
Source: PubMed Central journal article supplement (PMC6351170)
Supplement: NIHMS1511190-supplement-1.pdf [file NIHMS1511190-supplement-1.pdf]

**Supplementary Table 1. Summary of previous findings of air pollution and spontaneous pregnancy loss studies by pollutant and exposure type.**

| Author      | Pollutant |     |    |     |    |     |     | Acute Exposure | Chronic Exposure |
|-------------|-----------|-----|----|-----|----|-----|-----|----------------|------------------|
|             | PM        | NO2 | O3 | SO2 | CO | CS2 | H2S |                |                  |
| Green       |           |     |    |     |    |     |     |                | +                |
| Di Ciaula   | +         | --  | +  |     |    |     |     |                | +                |
| Dastoorpoor | --        | --  | -- | +   | -- |     |     | --             | +                |
| Hemminki    |           |     |    |     | -- | --  | --  |                | +                |
| Ha          | +         | --  | +  | --  | -- |     |     | +              | +                |
| Moridi      | +         | +   | +  | --  | +  |     |     |                | +                |
| Hou         | --        | --  |    | +   |    |     |     |                | +                |
| Enkhmaa     | +         | +   | -- | +   | +  |     |     |                | +                |
| Periera     | --        | +   | -- | --  | -- |     |     | +              |                  |

+ = positive association

-- = tested, but no significant association

Blank squares indicate pollutant was not tested



**Supplementary Table 3. Results of testing for effect modification of association between short term**

| Air pollutant metric              | estimate | lcl     | ucl     | P <sub>interaction</sub> |
|-----------------------------------|----------|---------|---------|--------------------------|
| Average 3 day PM2.5 (µg/m3)       | 1.121739 | 0.99914 | 1.25937 | 0.49403                  |
| Average 7 day PM2.5 (µg/m3)       | 1.149113 | 0.99115 | 1.33224 | 0.50606                  |
| Maximum value 3 day PM2.5 (µg/m3) | 1.08241  | 0.98883 | 1.18484 | 0.58739                  |
| Maximum value 7 day PM2.5 (µg/m3) | 1.026013 | 0.93935 | 1.12067 | 0.68859                  |
| Average 3 day NO2 (ppb)           | 1.055928 | 0.92082 | 1.21086 | 0.69763                  |
| Average 7 day NO2 (ppb)           | 1.123322 | 0.9416  | 1.34011 | 0.67994                  |
| Maximum value 3 day NO2 (ppb)     | 1.026628 | 0.90968 | 1.15862 | 0.69756                  |
| Maximum value 7 day NO2 (ppb)     | 0.997024 | 0.87706 | 1.13339 | 0.06022                  |
| Average 3 day O3 (ppb)            | 1.00048  | 0.98921 | 1.01187 | 0.62213                  |
| Average 7 day O3 (ppb)            | 1.001421 | 0.98797 | 1.01505 | 0.80853                  |
| Maximum value 3 day O3 (ppb)      | 1.001201 | 0.99072 | 1.01179 | 0.72805                  |
| Maximum value 7 day O3 (ppb)      | 1.001792 | 0.9897  | 1.01403 | 0.87313                  |

**exposure to air pollutants and spontaneous pregnancy loss by Hispanic ethnicity.**
